# Supplementary material for: Enterovirus detection in different regions of Madagascar reveals a higher abundance of enteroviruses of species C in areas where several outbreaks of vaccine-derived polioviruses occurred
Source: Springer Nature journal article supplement (doi:10.1186/s12879-022-07826-0), 2022-11-08
Supplement: MOESM1 [file 23689186]

Table S1. Accession numbers of the sequences used to draw the tree displayed in Figure 7.

| <b>Sequences retrieved from GenBank</b> | <b>Sequences from this study</b> |
|-----------------------------------------|----------------------------------|
| CVA1 JX174176                           | CVA11 MAD2566-11 OK570217 TOL    |
| AB180070                                | CVA11 MAD2635-11 OK570238 TOL    |
| AB180071                                | CVA11 MAD2820-11 OK570229 TLG    |
| AB180072                                | CVA11 MAD2862-11 OK570235 TLG    |
| AB180073                                | CVA11 MAD2869-11 OK570228 TLG    |
| AB205395                                | CVA11 MAD2875-11 OK570223 TLG    |
| AB769152                                | CVA11 MAD2957-11 OK570196 TLG    |
| AB769154                                | CVA11 MAD3086-11 OK570204 TLG    |
| AB769156                                | CVA11 MAD3991-11 OK570220 MAH    |
| AB769159                                | CVA11 MAD9851-11 OK570201 ATS    |
| AB769160                                | CVA13 MAD2562-11 OK570227 TOL    |
| AB769161                                | CVA13 MAD2729-11 OK570214 TOL    |
| AB769162                                | CVA13 MAD2823-11 OK570199 TLG    |
| AB769163                                | CVA13 MAD2824-11-b OK570207 TLG  |
| AB769164                                | CVA13 MAD3063-11 OK570206 TLG    |
| AB769165                                | CVA13 MAD3168-11 OK570226 TLG    |
| AF111953                                | CVA13 MAD3199-11 OK570192 MAH    |
| AF111961                                | CVA13 MAD3974-11 OK570222 MAH    |
| AF111966                                | CVA13 MAD9460-11 OK570215 MAH    |
| AF111981                                | CVA13 MAD9766-11 OK570243 ATS    |
| AF111982                                | CVA13 MAD9813-11 OK570197 ATS    |
| AF111983                                | CVA17 MAD2640-11 OK570218 TOL    |
| AF111984                                | CVA20 MAD2569-11 OK570236 TOL    |
| AF405662                                | CVA20 MAD2694-11-b OK570211 TOL  |
| AF405663                                | CVA20 MAD3090-11 OK570193 TLG    |
| AF405664                                | CVA20 MAD3927-11 OK570239 MAH    |
| AF405665                                | CVA20 MAD9660-11 OK570205 ATS    |
| AF405666                                | CVA20 MAD9899-11 OK570242 ATS    |
| AF405667                                | CVA20 MAD9912-11 OK570230 ATS    |
| AF405668                                | CVA24 MAD2770-11 OK570200 TOL    |
| AF405669                                | CVA24 MAD3181-11 OK570241 MAH    |
| AF405670                                | CVA24 MAD9525-11 OK570234 MAH    |
| AF405671                                | CVA24 MAD9932-11 OK570202 ATS    |
| AF405672                                | EV-C99 MAD2947-11-a OK570231 TLG |
| AF405673                                | EV-C99 MAD3091-11 OK570194 TLG   |
| AF405674                                | EV-C99 MAD9935-11 OK570210 ATS   |
| AF405675                                | CVA11 MAD2862-11 OK570235 TLG    |
| AF405676                                | CVA11 MAD2869-11 OK570228 TLG    |
| AF405677                                | CVA11 MAD2875-11 OK570223 TLG    |
| AF405678                                | CVA11 MAD2957-11 OK570196 TLG    |
| AF405679                                | CVA11 MAD3086-11 OK570204 TLG    |

|          |                                  |
|----------|----------------------------------|
| AF405680 | CVA11 MAD3991-11 OK570220 MAH    |
| AF405681 | CVA11 MAD9851-11 OK570201 ATS    |
| AF405682 | CVA13 MAD2562-11 OK570227 TOL    |
| AF405683 | CVA13 MAD2729-11 OK570214 TOL    |
| AF405684 | CVA13 MAD2823-11 OK570199 TLG    |
| AF405685 | CVA13 MAD2824-11-b OK570207 TLG  |
| AF405686 | CVA13 MAD3063-11 OK570206 TLG    |
| AF405687 | CVA13 MAD3168-11 OK570226 TLG    |
| AF405688 | CVA13 MAD3199-11 OK570192 MAH    |
| AF405689 | CVA13 MAD3974-11 OK570222 MAH    |
| AF405690 | CVA13 MAD9460-11 OK570215 MAH    |
| AF416342 | CVA13 MAD9766-11 OK570243 ATS    |
| AF448782 | CVA13 MAD9813-11 OK570197 ATS    |
| AF448783 | CVA17 MAD2640-11 OK570218 TOL    |
| AF458333 | CVA20 MAD2569-11 OK570236 TOL    |
| AF462418 | CVA20 MAD2694-11-b OK570211 TOL  |
| AF462419 | CVA20 MAD3090-11 OK570193 TLG    |
| AF465511 | CVA20 MAD3927-11 OK570239 MAH    |
| AF465515 | CVA20 MAD9660-11 OK570205 ATS    |
| AF499636 | CVA20 MAD9899-11 OK570242 ATS    |
| AF499638 | CVA20 MAD9912-11 OK570230 ATS    |
| AF499639 | CVA24 MAD2770-11 OK570200 TOL    |
| AF499640 | CVA24 MAD3181-11 OK570241 MAH    |
| AF499642 | CVA24 MAD9525-11 OK570234 MAH    |
| AF538840 | CVA24 MAD9932-11 OK570202 ATS    |
| AF538841 | EV-C99 MAD2947-11-a OK570231 TLG |
| AF538842 | EV-C99 MAD3091-11 OK570194 TLG   |
| AF538843 | EV-C99 MAD9935-11 OK570210 ATS   |
| AF541919 | CVA11 MAD2566-11 OK570217 TOL    |
| AF546702 | CVA11 MAD2635-11 OK570238 TOL    |
| AJ132960 | CVA11 MAD2820-11 OK570229 TLG    |
| AJ132961 | CVA11 MAD2862-11 OK570235 TLG    |
| AJ416942 | CVA11 MAD2869-11 OK570228 TLG    |
| AJ430385 | CVA11 MAD2875-11 OK570223 TLG    |
| AJ544513 | CVA11 MAD2957-11 OK570196 TLG    |
| AM040035 | CVA11 MAD3086-11 OK570204 TLG    |
| AM040036 | CVA11 MAD3991-11 OK570220 MAH    |
| AM040037 | CVA11 MAD9851-11 OK570201 ATS    |
| AM040038 | CVA13 MAD2562-11 OK570227 TOL    |
| AM040039 | CVA13 MAD2729-11 OK570214 TOL    |
| AM084223 | CVA13 MAD2823-11 OK570199 TLG    |
| AM084224 | CVA13 MAD2824-11-b OK570207 TLG  |
| AM084225 | CVA13 MAD3063-11 OK570206 TLG    |
| AM884184 | CVA13 MAD3168-11 OK570226 TLG    |
| AM884185 | CVA13 MAD3199-11 OK570192 MAH    |
| AY184219 | CVA13 MAD3974-11 OK570222 MAH    |

|          |                                  |
|----------|----------------------------------|
| AY184221 | CVA13 MAD9460-11 OK570215 MAH    |
| AY238473 | CVA13 MAD9766-11 OK570243 ATS    |
| AY278550 | CVA13 MAD9813-11 OK570197 ATS    |
| AY278551 | CVA17 MAD2640-11 OK570218 TOL    |
| AY278552 | CVA20 MAD2569-11 OK570236 TOL    |
| AY278553 | CVA20 MAD2694-11-b OK570211 TOL  |
| AY421739 | CVA20 MAD3090-11 OK570193 TLG    |
| AY560657 | CVA20 MAD3927-11 OK570239 MAH    |
| AY876912 | CVA20 MAD9660-11 OK570205 ATS    |
| AY876913 | CVA20 MAD9899-11 OK570242 ATS    |
| AY928383 | CVA20 MAD9912-11 OK570230 ATS    |
| AY928384 | CVA24 MAD2770-11 OK570200 TOL    |
| AY928385 | CVA24 MAD3181-11 OK570241 MAH    |
| AY928386 | CVA24 MAD9525-11 OK570234 MAH    |
| AY928387 | CVA24 MAD9932-11 OK570202 ATS    |
| AY948201 | EV-C99 MAD2947-11-a OK570231 TLG |
| MT432082 | EV-C99 MAD3091-11 OK570194 TLG   |
| MT432083 | EV-C99 MAD9935-11 OK570210 ATS   |
| MT432084 |                                  |
| MT432085 |                                  |
| MT432086 |                                  |
| MT432087 |                                  |
| MT432088 |                                  |
| MT432089 |                                  |
| MT432090 |                                  |
| MT432091 |                                  |
| MT432092 |                                  |
| MT432093 |                                  |
| MT432094 |                                  |
| MT432154 |                                  |
| MT432095 |                                  |
| MT432098 |                                  |
| MT432099 |                                  |
| MT432100 |                                  |
| MT432101 |                                  |
| MT432102 |                                  |
| MT432103 |                                  |
| MT432104 |                                  |
| MT432105 |                                  |
| MT432119 |                                  |
| MT432120 |                                  |
| MT432121 |                                  |
| MT432122 |                                  |
| MT432123 |                                  |
| MT432124 |                                  |
| MT432125 |                                  |

|          |  |
|----------|--|
| MT432126 |  |
| MT432127 |  |
| MT432131 |  |
| MT432132 |  |
| MT432133 |  |
| MT432135 |  |
| CXA21CG  |  |
| CXA24CG  |  |
| DQ443001 |  |
| DQ443002 |  |
| DQ890385 |  |
| DQ890386 |  |
| DQ890387 |  |
| DQ890388 |  |
| DQ995633 |  |
| DQ995634 |  |
| DQ995635 |  |
| DQ995636 |  |
| DQ995637 |  |
| DQ995638 |  |
| DQ995639 |  |
| DQ995640 |  |
| DQ995641 |  |
| DQ995642 |  |
| DQ995643 |  |
| DQ995644 |  |
| DQ995645 |  |
| DQ995646 |  |
| EF015008 |  |
| EF015009 |  |
| EF015010 |  |
| EF015011 |  |
| EF015012 |  |
| EF015013 |  |
| EF015014 |  |
| EF015015 |  |
| EF015016 |  |
| EF015017 |  |
| EF015018 |  |
| EF015019 |  |
| EF015020 |  |
| EF015021 |  |
| EF015022 |  |
| EF015023 |  |
| EF015024 |  |
| EF015025 |  |

|          |  |
|----------|--|
| EF015026 |  |
| EF015027 |  |
| EF015028 |  |
| EF015029 |  |
| EF015030 |  |
| EF015031 |  |
| EF015032 |  |
| EF015033 |  |
| EF015034 |  |
| EF015035 |  |
| EF015036 |  |
| EF015037 |  |
| EF015038 |  |
| EF015039 |  |
| EF015040 |  |
| EF026081 |  |
| EF456706 |  |
| EF555644 |  |
| EF555645 |  |
| EF682343 |  |
| EF682344 |  |
| EF682345 |  |
| EF682346 |  |
| EF682347 |  |
| EF682348 |  |
| EF682349 |  |
| EF682350 |  |
| EF682351 |  |
| EF682352 |  |
| EF682353 |  |
| EF682354 |  |
| EF682355 |  |
| EF682356 |  |
| EF682357 |  |
| EF682358 |  |
| EF682359 |  |
| MT432146 |  |
| MT432140 |  |
| MT432142 |  |
| MT432143 |  |
| MT432149 |  |
| MT432150 |  |
| EU566934 |  |
| EU566935 |  |
| EU566936 |  |
| EU566937 |  |

|          |  |
|----------|--|
| EU566938 |  |
| EU566939 |  |
| EU566940 |  |
| EU566941 |  |
| EU566942 |  |
| EU566943 |  |
| EU566944 |  |
| EU566945 |  |
| EU566946 |  |
| EU566947 |  |
| EU566948 |  |
| EU566949 |  |
| EU566950 |  |
| EU684056 |  |
| EU684057 |  |
| EU794953 |  |
| EU794954 |  |
| EU794955 |  |
| EU794956 |  |
| EU794957 |  |
| EU794958 |  |
| EU794959 |  |
| EU794960 |  |
| EU794961 |  |
| EU794962 |  |
| EU794963 |  |
| EU794964 |  |
| FJ460223 |  |
| FJ460224 |  |
| FJ460225 |  |
| FJ460226 |  |
| FJ517649 |  |
| FJ751915 |  |
| FJ769378 |  |
| FJ769379 |  |
| FJ769380 |  |
| FJ769381 |  |
| FJ769382 |  |
| FJ769383 |  |
| FJ769384 |  |
| FJ769385 |  |
| FJ842158 |  |
| FJ842159 |  |
| FJ859058 |  |
| FJ859059 |  |
| FJ859060 |  |

|          |  |
|----------|--|
| FJ859061 |  |
| FJ859062 |  |
| FJ859063 |  |
| FJ859064 |  |
| FJ859183 |  |
| FJ859184 |  |
| FJ859185 |  |
| FJ859186 |  |
| FJ859187 |  |
| FJ859188 |  |
| FJ859189 |  |
| FJ859190 |  |
| FJ859191 |  |
| FJ898290 |  |
| FJ914252 |  |
| FM955278 |  |
| GQ984141 |  |
| GU180608 |  |
| GU256222 |  |
| GU390707 |  |
| HF913426 |  |
| HF913427 |  |
| HM107832 |  |
| HM107833 |  |
| HM107834 |  |
| HQ415758 |  |
| HQ415759 |  |
| HQ738286 |  |
| HQ738287 |  |
| HQ738288 |  |
| HQ738289 |  |
| HQ738290 |  |
| HQ738291 |  |
| HQ738292 |  |
| HQ738293 |  |
| HQ738294 |  |
| HQ738295 |  |
| HQ738296 |  |
| HQ738297 |  |
| HQ738298 |  |
| HQ738299 |  |
| HQ738300 |  |
| HQ738301 |  |
| HQ738302 |  |
| HQ738303 |  |
| JF260924 |  |

|          |  |
|----------|--|
| JF260925 |  |
| JF260926 |  |
| JF742576 |  |
| JF742577 |  |
| JF742578 |  |
| JF742579 |  |
| JF838278 |  |
| JN228097 |  |
| JX274980 |  |
| JX274981 |  |
| JX274982 |  |
| JX274983 |  |
| JX274984 |  |
| JX274985 |  |
| JX274987 |  |
| JX274993 |  |
| JX274995 |  |
| JX274999 |  |
| JX275008 |  |
| JX275015 |  |
| JX275032 |  |
| JX275071 |  |
| JX275140 |  |
| JX275147 |  |
| JX275162 |  |
| JX275184 |  |
| JX275238 |  |
| JX275266 |  |
| JX275352 |  |
| JX569709 |  |
| JX569710 |  |
| JX569711 |  |
| JX569712 |  |
| KC784367 |  |
| KC784368 |  |
| KC784372 |  |
| KC880365 |  |
| KC880366 |  |
| KC880367 |  |
| KC880368 |  |
| KC880369 |  |
| KC880370 |  |
| KC880371 |  |
| KC880372 |  |
| KC880373 |  |
| KC880374 |  |



|          |  |
|----------|--|
| KC880375 |  |
| KC880376 |  |
| KC880377 |  |
| KC880378 |  |
| KC880379 |  |
| KC880380 |  |
| KC880381 |  |
| KC880382 |  |
| KF128998 |  |
| KF129411 |  |
| KF129412 |  |
| KF495604 |  |
| KF537633 |  |
| KF667358 |  |
| KF667359 |  |
| KF667360 |  |
| KF667361 |  |
| KF725085 |  |
| KJ019831 |  |
| KJ019832 |  |
| KJ019833 |  |
| KJ155495 |  |
| KJ155496 |  |
| KJ155499 |  |
| KJ155500 |  |
| KJ170436 |  |
| KJ170437 |  |
| KJ170438 |  |
| KJ170439 |  |
| KJ170440 |  |
| KJ170441 |  |
| KJ170442 |  |
| KJ170443 |  |
| KJ170444 |  |
| KJ170445 |  |
| KJ170446 |  |
| KJ170447 |  |
| KJ170448 |  |
| KJ170449 |  |
| KJ170450 |  |
| KJ170451 |  |
| KJ170452 |  |
| KJ170453 |  |
| KJ170454 |  |
| KJ170455 |  |
| KJ170456 |  |

|          |  |
|----------|--|
| KJ170457 |  |
| KJ170458 |  |
| KJ170459 |  |
| KJ170460 |  |
| KJ170461 |  |
| KJ170462 |  |
| KJ170463 |  |
| KJ170464 |  |
| KJ170465 |  |
| KJ170466 |  |
| KJ170467 |  |
| KJ170468 |  |
| KJ170469 |  |
| KJ170470 |  |
| KJ170471 |  |
| KJ170472 |  |
| KJ170473 |  |
| KJ170474 |  |
| KJ170475 |  |
| KJ170476 |  |
| KJ170477 |  |
| KJ170478 |  |
| KJ170479 |  |
| KJ170480 |  |
| KJ170481 |  |
| KJ170482 |  |
| KJ170483 |  |
| KJ170484 |  |
| KJ170485 |  |
| KJ170486 |  |
| KJ170487 |  |
| KJ170488 |  |
| KJ170489 |  |
| KJ170490 |  |
| KJ170491 |  |
| KJ170492 |  |
| KJ170493 |  |
| KJ170494 |  |
| KJ170495 |  |
| KJ170496 |  |
| KJ170497 |  |
| KJ170498 |  |
| KJ170499 |  |
| KJ170500 |  |
| KJ170501 |  |
| KJ170502 |  |

|          |  |
|----------|--|
| KJ170503 |  |
| KJ170504 |  |
| KJ170505 |  |
| KJ170506 |  |
| KJ170507 |  |
| KJ170508 |  |
| KJ170509 |  |
| KJ170510 |  |
| KJ170511 |  |
| KJ170512 |  |
| KJ170513 |  |
| KJ170514 |  |
| KJ170515 |  |
| KJ170516 |  |
| KJ170517 |  |
| KJ170518 |  |
| KJ170519 |  |
| KJ170520 |  |
| KJ170521 |  |
| KJ170522 |  |
| KJ170523 |  |
| KJ170524 |  |
| KJ170525 |  |
| KJ170526 |  |
| KJ170527 |  |
| KJ170528 |  |
| KJ170529 |  |
| KJ170530 |  |
| KJ170531 |  |
| KJ170532 |  |
| KJ170576 |  |
| KJ170577 |  |
| KJ170578 |  |
| KJ170579 |  |
| KJ170580 |  |
| KJ170581 |  |
| KJ170582 |  |
| KJ170583 |  |
| KJ170584 |  |
| KJ170585 |  |
| KJ170586 |  |
| KJ170587 |  |
| KJ170588 |  |
| KJ170589 |  |
| KJ170590 |  |
| KJ170591 |  |

|          |  |
|----------|--|
| KJ170592 |  |
| KJ170593 |  |
| KJ170594 |  |
| KJ170595 |  |
| KJ170596 |  |
| KJ170597 |  |
| KJ170598 |  |
| KJ170599 |  |
| KJ170600 |  |
| KJ170601 |  |
| KJ170602 |  |
| KJ170603 |  |
| KJ170604 |  |
| KJ170605 |  |
| KJ170606 |  |
| KJ170607 |  |
| KJ170608 |  |
| KJ170609 |  |
| KJ170610 |  |
| KJ170611 |  |
| KJ170612 |  |
| KJ170613 |  |
| KJ170614 |  |
| KJ170615 |  |
| KJ170616 |  |
| KJ170617 |  |
| KJ170618 |  |
| KJ170619 |  |
| KJ170620 |  |
| KJ170621 |  |
| KJ170622 |  |
| KJ170623 |  |
| KJ170624 |  |
| KJ170625 |  |
| KJ170626 |  |
| KJ170627 |  |
| KJ170628 |  |
| KJ170629 |  |
| KJ170630 |  |
| KJ170631 |  |
| KJ170632 |  |
| KJ170633 |  |
| KJ170634 |  |
| KJ170635 |  |
| KJ170636 |  |
| KJ170637 |  |

|          |  |
|----------|--|
| KJ170638 |  |
| KJ170639 |  |
| KJ170640 |  |
| KJ170641 |  |
| KJ170642 |  |
| KJ170643 |  |
| KJ170644 |  |
| KJ170645 |  |
| KJ170646 |  |
| KJ170647 |  |
| KJ170648 |  |
| KJ170649 |  |
| KJ170650 |  |
| KJ170651 |  |
| KJ170652 |  |
| KJ170653 |  |
| KJ170654 |  |
| KJ170655 |  |
| KJ170656 |  |
| KJ170657 |  |
| KJ170658 |  |
| KJ170659 |  |
| KJ170660 |  |
| KJ170661 |  |
| KJ170662 |  |
| KJ170663 |  |
| KJ170664 |  |
| KJ170665 |  |
| KJ170666 |  |
| KJ170667 |  |
| KJ170668 |  |
| KJ170669 |  |
| KJ170670 |  |
| KJ170671 |  |
| KJ170672 |  |
| KJ170673 |  |
| KJ170674 |  |
| KJ170675 |  |
| KJ170676 |  |
| KJ170677 |  |
| KJ419273 |  |
| KJ419274 |  |
| KJ419275 |  |
| KJ419276 |  |
| KJ419277 |  |
| KJ857507 |  |

|          |  |
|----------|--|
| KJ857508 |  |
| KM273014 |  |
| KP196613 |  |
| KP984753 |  |
| KP984754 |  |
| KR259355 |  |
| KR259358 |  |
| KR399988 |  |
| KR478685 |  |
| KR919804 |  |
| KT161266 |  |
| KT353719 |  |
| KT946713 |  |
| KT946715 |  |
| KT946716 |  |
| KT946717 |  |
| KU161395 |  |
| KU161396 |  |
| KU161397 |  |
| KU161398 |  |
| KU161399 |  |
| KU183495 |  |
| KU372652 |  |
| KU866422 |  |
| KX162678 |  |
| KX162679 |  |
| KX162680 |  |
| KX162681 |  |
| KX162682 |  |
| KX162683 |  |
| KX162684 |  |
| KX162685 |  |
| KX162686 |  |
| KX162687 |  |
| KX162688 |  |
| KX162689 |  |
| KX162690 |  |
| KX162691 |  |
| KX162692 |  |
| KX162693 |  |
| KX162694 |  |
| KX162695 |  |
| KX162696 |  |
| KX162697 |  |
| KX162698 |  |
| KX162699 |  |

|          |  |
|----------|--|
| KX162700 |  |
| KX162701 |  |
| KX162702 |  |
| KX162703 |  |
| KX162704 |  |
| KX162705 |  |
| KX162706 |  |
| KX162708 |  |
| KX162710 |  |
| KX162711 |  |
| KX162712 |  |
| KX162713 |  |
| KX162714 |  |
| KX162715 |  |
| KX162716 |  |
| KX384961 |  |
| KX384962 |  |
| KX384963 |  |
| KX384964 |  |
| KY271947 |  |
| KY284011 |  |
| KY703697 |  |
| KY941931 |  |
| KY941932 |  |
| KY941933 |  |
| KY941934 |  |
| KY941935 |  |
| LC279542 |  |
| LR796218 |  |
| LS451300 |  |
| LS451301 |  |
| LT934387 |  |
| MF189567 |  |
| MF346171 |  |
| MF419263 |  |
| MF541373 |  |
| MF990304 |  |
| MF990307 |  |
| MG212427 |  |
| MG212428 |  |
| MG212429 |  |
| MG212430 |  |
| MG212431 |  |
| MG212432 |  |
| MG212433 |  |
| MG212434 |  |

|          |  |
|----------|--|
| MG212435 |  |
| MG212436 |  |
| MG212437 |  |
| MG212438 |  |
| MG212439 |  |
| MG212440 |  |
| MG212441 |  |
| MG212442 |  |
| MG212443 |  |
| MG212444 |  |
| MG212445 |  |
| MG212446 |  |
| MG212447 |  |
| MG212448 |  |
| MG212449 |  |
| MG212450 |  |
| MG212451 |  |
| MG212452 |  |
| MG212453 |  |
| MG212454 |  |
| MG212455 |  |
| MG212456 |  |
| MG212457 |  |
| MG212458 |  |
| MG212459 |  |
| MG212460 |  |
| MG212461 |  |
| MG212462 |  |
| MG212463 |  |
| MG212464 |  |
| MG212465 |  |
| MG212466 |  |
| MG212467 |  |
| MG212468 |  |
| MG212469 |  |
| MG212471 |  |
| MG212472 |  |
| MG212474 |  |
| MG212475 |  |
| MG212476 |  |
| MG212477 |  |
| MG212478 |  |
| MG212479 |  |
| MG212480 |  |
| MG212481 |  |
| MG212482 |  |



|          |  |
|----------|--|
| MG212483 |  |
| MG212484 |  |
| MG212486 |  |
| MG212487 |  |
| MG212489 |  |
| MG212490 |  |
| MG212491 |  |
| MG212493 |  |
| MG212494 |  |
| MG212495 |  |
| MG451807 |  |
| MG557561 |  |
| MG557562 |  |
| MG557563 |  |
| MG571840 |  |
| MG571841 |  |
| MG571844 |  |
| MG571860 |  |
| MG880745 |  |
| MG880747 |  |
| MG880748 |  |
| MG880749 |  |
| MG880750 |  |
| MG880751 |  |
| MG880752 |  |
| MG982663 |  |
| MH144606 |  |
| MH484164 |  |
| MH484166 |  |
| MH750912 |  |
| MH785183 |  |
| MK028134 |  |
| MK512667 |  |
| MK512668 |  |
| MK652144 |  |
| MK689071 |  |
| MK989717 |  |
| MK989718 |  |
| MK989719 |  |
| MK989720 |  |
| MK989721 |  |
| MK989722 |  |
| MN149910 |  |
| MN914197 |  |
| MN914201 |  |
| MN914202 |  |

|          |  |
|----------|--|
| MN914203 |  |
| MN914204 |  |
| MN914205 |  |
| MN914206 |  |
| MN918613 |  |
| MT432082 |  |
| MT432083 |  |
| MT432084 |  |
| MT432085 |  |
| MT432086 |  |
| MT432087 |  |
| MT432088 |  |
| MT432089 |  |
| MT432090 |  |
| MT432091 |  |
| MT432092 |  |
| MT432093 |  |
| MT432094 |  |
| MT432095 |  |
| MT432096 |  |
| MT432097 |  |
| MT432098 |  |
| MT432099 |  |
| MT432100 |  |
| MT432101 |  |
| MT432102 |  |
| MT432103 |  |
| MT432104 |  |
| MT432105 |  |
| MT432106 |  |
| MT432107 |  |
| MT432108 |  |
| MT432109 |  |
| MT432110 |  |
| MT432111 |  |
| MT432112 |  |
| MT432113 |  |
| MT432114 |  |
| MT432115 |  |
| MT432119 |  |
| MT432120 |  |
| MT432121 |  |
| MT432122 |  |
| MT432123 |  |
| MT432124 |  |
| MT432125 |  |

|          |  |
|----------|--|
| MT432126 |  |
| MT432127 |  |
| MT432128 |  |
| MT432129 |  |
| MT432130 |  |
| MT432131 |  |
| MT432132 |  |
| MT432133 |  |
| MT432134 |  |
| MT432135 |  |
| MT432137 |  |
| MT432138 |  |
| MT432139 |  |
| MT432140 |  |
| MT432141 |  |
| MT432142 |  |
| MT432143 |  |
| MT432144 |  |
| MT432145 |  |
| MT432146 |  |
| MT432147 |  |
| MT432148 |  |
| MT432149 |  |
| MT432150 |  |
| MT432151 |  |
| MT645947 |  |
| MT645948 |  |
| MT645949 |  |
| MT645950 |  |
| MT645951 |  |
| MW366963 |  |
| MW366964 |  |
| MW366965 |  |
| MZ396299 |  |
| MZ546188 |  |
