# Supplementary material for: Enterovirus detection in different regions of Madagascar reveals a higher abundance of enteroviruses of species C in areas where several outbreaks of vaccine-derived polioviruses occurred
Source: Springer Nature journal article supplement (doi:10.1186/s12879-022-07826-0), 2022-11-08

Figure S1. Detection of NPEVs on RD and HEp-2c cells.

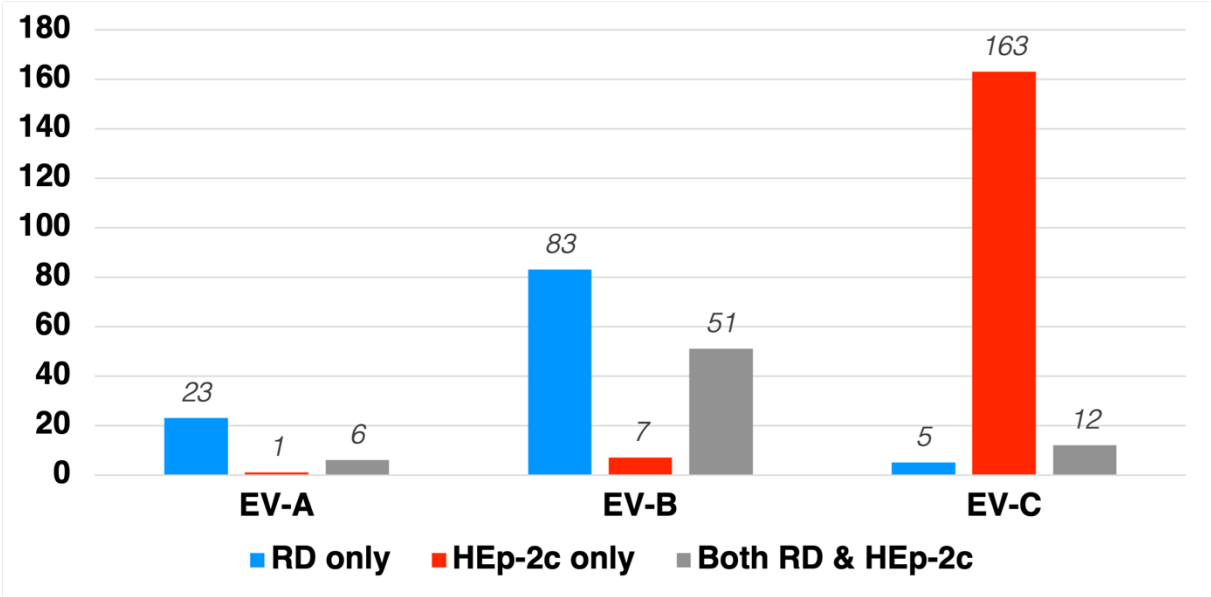

Supplement: MOESM2 [file 23689186]
